# Supplementary material
Source: PubMed Central journal article supplement (PMC6746604)
Supplement: NIHMS1043438-supplement-Table_1__2.pdf [file NIHMS1043438-supplement-Table_1__2.pdf]

ONLINE ONLY

## Supplemental material

### Assessment of the endoscopic endonasal approach to the basilar apex region for aneurysm clipping

A. Tayebi Meybodi et al.

<https://thejns.org/doi/abs/10.3171/2018.1.JNS172813>

**DISCLAIMER** The *Journal of Neurosurgery* acknowledges that the following section is published verbatim as submitted by the authors and did not go through either the *Journal's* peer-review or editing process.

Supplemental Table 1. Analysis of EEA for different cutoff points defined for BAX height.

| Cutoff point for BAX height (mm) | PCA exposure <sup>*,#</sup> |           | PCA Clipping |           | SCA Exposure     |           | SCA Clipping |           | PCA perforators  |           | Proximal Basilar Exposure/Clipping |            | Surgical Area of Exposure |           |
|----------------------------------|-----------------------------|-----------|--------------|-----------|------------------|-----------|--------------|-----------|------------------|-----------|------------------------------------|------------|---------------------------|-----------|
|                                  | ≤ cutoff                    | > cutoff  | ≤ cutoff     | > cutoff  | ≤ cutoff         | > cutoff  | ≤ cutoff     | > cutoff  | ≤ cutoff         | > cutoff  | ≤ cutoff                           | > cutoff   | ≤ cutoff                  | > cutoff  |
| -5                               | 11.0 ± 4.4                  | 7.7 ± 4.6 | 6.2 ± 3.0    | 4.4 ± 3.8 | 9.1 ± 2.2        | 6.9 ± 4.1 | 6.8 ± 2.4    | 4.4 ± 2.9 | 4.6 ± 2.8        | 1.9 ± 1.7 | 17.7 ± 3.0                         | 17.9 ± 4.3 | 3.3 ± 0.7                 | 2.8 ± 0.9 |
| p-value                          | <b>0.04<sup>†</sup></b>     |           | 0.11         |           | 0.08             |           | <b>0.04</b>  |           | <b>0.001</b>     |           | 0.46                               |            | 0.19                      |           |
| -4, -3 <sup>‡</sup>              | 10.7 ± 3.8                  | 6.2 ± 4.6 | 6.3 ± 3.4    | 3.2 ± 3.1 | 9.7 ± 2.4        | 4.9 ± 3.7 | 6.2 ± 1.9    | 3.7 ± 3.2 | 3.8 ± 2.4        | 1.4 ± 1.5 | 17.9 ± 2.4                         | 17.4 ± 5.3 | 3.3 ± 0.5                 | 2.5 ± 1.0 |
| p-value                          | <b>0.003</b>                |           | <b>0.01</b>  |           | <b>&lt;0.001</b> |           | <b>0.01</b>  |           | <b>0.001</b>     |           | 0.41                               |            | <b>0.04</b>               |           |
| -2, -1, 0, +1 <sup>†</sup>       | 10.4 ± 3.7                  | 5.9 ± 5.0 | 6.3 ± 3.2    | 2.7 ± 3.0 | 9.3 ± 2.4        | 4.7 ± 3.9 | 6.1 ± 1.8    | 3.4 ± 3.4 | 3.7 ± 2.3        | 1.1 ± 1.4 | 17.3 ± 2.9                         | 18.3 ± 5.3 | 3.1 ± 0.7                 | 2.7 ± 1.0 |
| p-value                          | <b>0.004</b>                |           | <b>0.002</b> |           | <b>&lt;0.001</b> |           | <b>0.01</b>  |           | <b>&lt;0.001</b> |           | 0.25                               |            | 0.17                      |           |
| +2                               | 9.3 ± 4.8                   | 7.1 ± 6.4 | 5.7 ± 3.6    | 3.2 ± 3.0 | 8.4 ± 3.7        | 5.6 ± 3.6 | 5.4 ± 2.6    | 4.1 ± 3.3 | 3.3 ± 2.4        | 1.3 ± 1.4 | 17.6 ± 2.9                         | 17.9 ± 5.9 | 3.1 ± 0.7                 | 2.7 ± 1.2 |
| p-value                          | 0.12                        |           | <b>0.04</b>  |           | <b>0.03</b>      |           | 0.12         |           | <b>0.01</b>      |           | 0.43                               |            | 0.25                      |           |
| +3                               | 8.6 ± 4.9                   | 6.4 ± 4.9 | 5.4 ± 3.6    | 2.5 ± 2.7 | 7.7 ± 4.0        | 4.8 ± 3.5 | 5.2 ± 2.9    | 3.3 ± 3.2 | 2.9 ± 2.3        | 0.8 ± 1.0 | 17.3 ± 3.5                         | 16.8 ± 6.1 | 3.1 ± 0.8                 | 2.2 ± 0.4 |
| p-value                          | 0.13                        |           | <b>0.02</b>  |           | <b>0.04</b>      |           | 0.07         |           | <b>0.008</b>     |           | 0.42                               |            | <b>0.04</b>               |           |

\* all values are represented as mean ± standard deviation.

#Exposure and clipping lengths are represented in millimeters; areas are represented in cm<sup>2</sup>.

† Bold-italic figures show statistically significant p-values.

‡ With these cutoff points the groups, did not differ which is due to small sample size.

BA = basilar artery; BAX = basilar apex; EEA = endoscopic endonasal approach; PCA = posterior cerebral artery; SCA = superior cerebellar artery.

Supplemental Table 2. Analysis of EEA + PT for different cutoff points defined for BAX height.

| Cutoff point for BAX height (mm) | PCA exposure <sup>*,#</sup> |            | PCA Clipping |           | SCA Exposure |           | SCA Clipping            |           | PCA perforators |           | Proximal BA Exposure/Clipping |            | Surgical Area of Exposure |           |
|----------------------------------|-----------------------------|------------|--------------|-----------|--------------|-----------|-------------------------|-----------|-----------------|-----------|-------------------------------|------------|---------------------------|-----------|
|                                  | ≤ cutoff                    | > cutoff   | ≤ cutoff     | > cutoff  | ≤ cutoff     | > cutoff  | ≤ cutoff                | > cutoff  | ≤ cutoff        | > cutoff  | ≤ cutoff                      | > cutoff   | ≤ cutoff                  | > cutoff  |
| -5                               | 12.9 ± 3.9                  | 11.3 ± 3.0 | 9.2 ± 3.6    | 9.3 ± 2.9 | 9.7 ± 2.6    | 8.8 ± 2.3 | 7.7 ± 2.1               | 5.9 ± 1.8 | 5.4 ± 3.1       | 3.5 ± 1.6 | 17.2 ± 2.8                    | 18.6 ± 4.0 | 4.2 ± 0.9                 | 3.7 ± 1.2 |
| p-value                          | 0.12                        |            | 0.46         |           | 0.17         |           | <b>0.02<sup>‡</sup></b> |           | <b>0.02</b>     |           | 0.26                          |            | 0.26                      |           |
| -4, -3 <sup>†</sup>              | 12.7 ± 3.5                  | 10.6 ± 2.8 | 9.6 ± 3.3    | 8.9 ± 2.8 | 10.0 ± 2.5   | 7.9 ± 1.7 | 6.9 ± 2.1               | 5.6 ± 1.6 | 4.8 ± 2.5       | 3.1 ± 1.3 | 17.9 ± 2.4                    | 18.3 ± 5.0 | 4.0 ± 0.7                 | 3.7 ± 1.5 |
| p-value                          | <b>0.03</b>                 |            | 0.28         |           | <b>0.007</b> |           | <b>0.03</b>             |           | <b>0.02</b>     |           | 0.36                          |            | 0.31                      |           |
| -2, -1, 0, +1 <sup>†</sup>       | 12.2 ± 3.7                  | 11.0 ± 2.7 | 9.3 ± 3.2    | 9.2 ± 2.9 | 9.6 ± 2.6    | 8.2 ± 1.7 | 6.7 ± 2.1               | 5.6 ± 1.7 | 4.6 ± 2.5       | 3.0 ± 1.2 | 17.3 ± 2.9                    | 19.7 ± 4.5 | 3.8 ± 0.7                 | 3.8 ± 1.6 |
| p-value                          | 0.18                        |            | 0.46         |           | 0.051        |           | 0.08                    |           | 0.09            |           | <b>0.04</b>                   |            | 0.48                      |           |
| +2                               | 12.0 ± 3.5                  | 11.1 ± 2.9 | 9.0 ± 3.1    | 9.7 ± 3.0 | 9.4 ± 2.6    | 8.3 ± 2.1 | 6.4 ± 2.1               | 5.9 ± 1.7 | 4.5 ± 2.4       | 3.0 ± 1.2 | 17.9 ± 3.3                    | 19.0 ± 4.7 | 3.9 ± 0.7                 | 3.8 ± 1.8 |
| p-value                          | 0.22                        |            | 0.30         |           | 0.11         |           | 0.25                    |           | 0.16            |           | 0.22                          |            | 0.44                      |           |
| +3                               | 12.0 ± 3.3                  | 9.9 ± 3.2  | 9.4 ± 3.1    | 8.7 ± 3.3 | 9.1 ± 2.4    | 8.1 ± 1.7 | 6.5 ± 2.0               | 5.0 ± 1.3 | 4.1 ± 2.3       | 3.0 ± 1.4 | 17.9 ± 3.3                    | 20.3 ± 7.4 | 3.9 ± 1.2                 | 3.6 ± 0.5 |
| p-value                          | 0.12                        |            | 0.34         |           | 0.21         |           | 0.07                    |           | 0.11            |           | 0.12                          |            | 0.38                      |           |

\* All values are represented as mean ± standard deviation.

#Exposure and clipping lengths are represented in millimeters; areas are represented in cm<sup>2</sup>

†With these cutoff points the groups did not differ, which is due to small sample size.

‡Bold-italic figures show statistically significant p-values.

BA = basilar artery; BAX = basilar apex; EEA = endoscopic endonasal approach; PCA = posterior cerebral artery; PT = pituitary transposition; SCA = superior cerebellar artery.
